# Supplementary material for: Treatment of Patients with Relapsed or Refractory Mantle–Cell Lymphoma with Zanubrutinib, a Selective Inhibitor of Bruton's Tyrosine Kinase
Source: Oxford University Press journal article supplement (doi:10.1158/1078-0432.ccr-19-3703), 2020-05-27

# **Appendix Figure 1**. Kaplan-Meier Plot Comparing PFS Among Patients With and Without Prior Rituximab


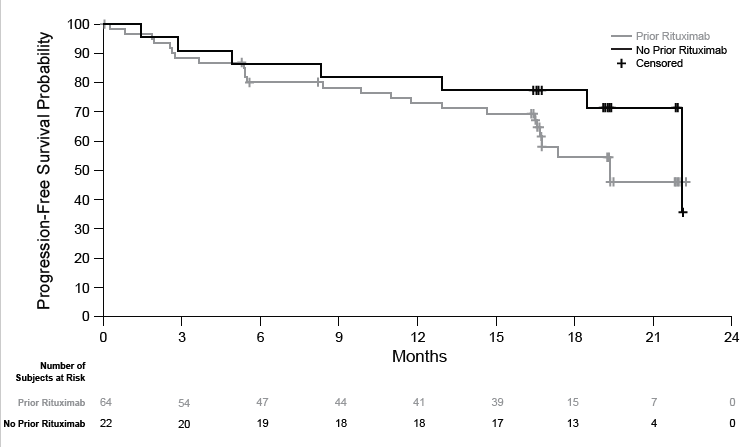

Supplement: 10780432ccr193703-sup-232246_2_supp_6313174_qlqlfb.docx [file 10780432ccr193703-sup-232246_2_supp_6313174_qlqlfb.docx]
