# Supplementary material for: Treatment of Patients with Relapsed or Refractory Mantle–Cell Lymphoma with Zanubrutinib, a Selective Inhibitor of Bruton's Tyrosine Kinase
Source: Oxford University Press journal article supplement (doi:10.1158/1078-0432.ccr-19-3703), 2020-05-27
Supplement: 10780432ccr193703-sup-232246_2_supp_6313175_q4q4g0.docx [file 10780432ccr193703-sup-232246_2_supp_6313175_q4q4g0.docx]

Appendix Figure 2. Changes from Baseline in the SPD for Target Lesions vs Best Overall Response as Assessed by IRC


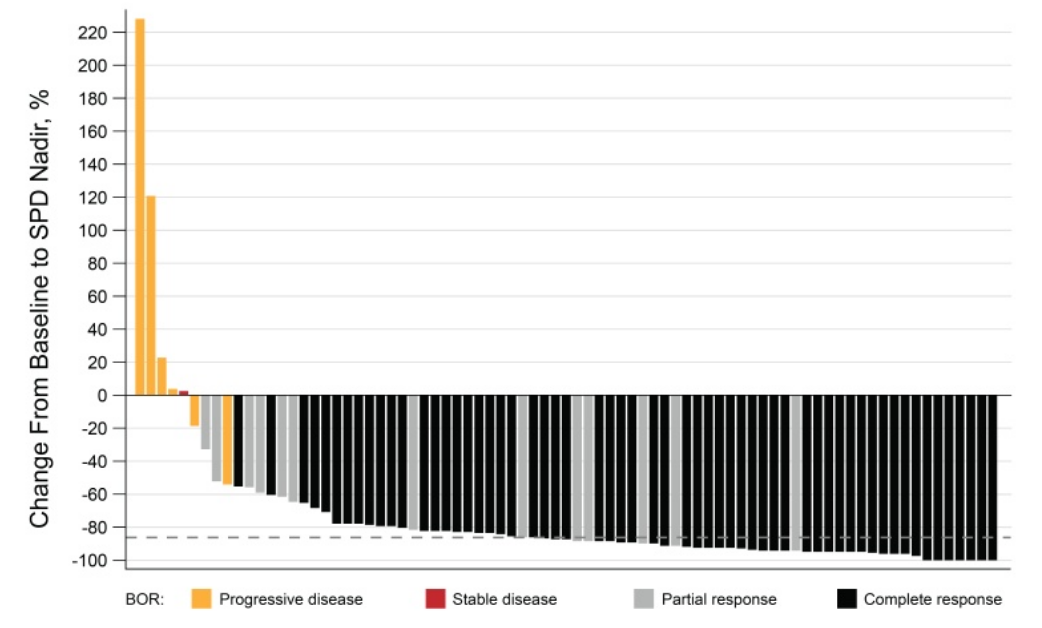


Note: Dashed line denotes median reduction in SPD (-87.0%).

BOR, best overall response; IRC, independent review committee; SPD, sum of product of perpendicular diameters
