# Supplementary material for: Treatment of Patients with Relapsed or Refractory Mantle–Cell Lymphoma with Zanubrutinib, a Selective Inhibitor of Bruton's Tyrosine Kinase
Source: Oxford University Press journal article supplement (doi:10.1158/1078-0432.ccr-19-3703), 2020-05-27

# **Appendix Figure 3.** Kaplan-Meier Plots Comparing Duration of Response (A) and Progression-Free Survival (B) Among Patients With and Without *TP53*-Mutated Tumors


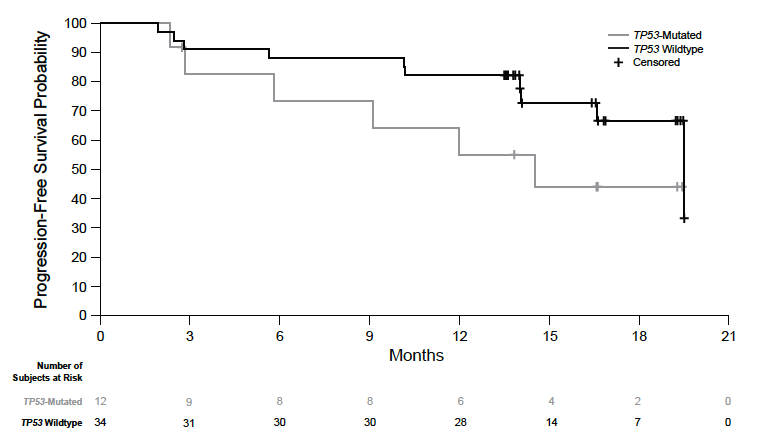

Supplement: 10780432ccr193703-sup-232246_2_supp_6313176_q7q7gv.docx [file 10780432ccr193703-sup-232246_2_supp_6313176_q7q7gv.docx]
